# Supplementary material
Source: MDPI journal article supplement (https://www.mdpi.com/2311-5637/7/4/219)
Supplement: s1 [file s1]

# Production of Omega-3 Fatty Acids from the Microalgae *Cryptocodinium cohnii* by Utilizing Both Pentose and Hexose Sugars From Agricultural Residues

Georgia Asimakopoulou, Anthi Karnaouri, Savvas Staikos, Stylianos D. Stefanidis, Angelos A.

Lappas, Evangelos Topakas

Supplementary Material

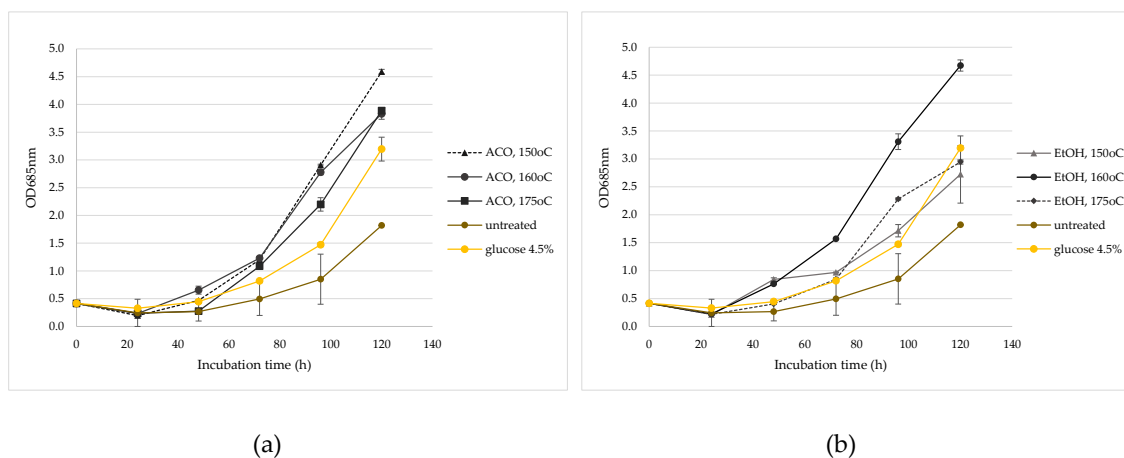

**Figure S1.** Time course of growth of *C. cohnii* cells on enzymatic hydrolysate from solid pulps as carbon source, as monitored spectrophotometrically at OD<sub>685nm</sub>.

**Table S1.** Concentration of phenolic compounds in the liquid fraction before and after detoxification.

| Sample | Phenolic compounds – initial concentration (mg/mL) | Phenolic compounds – after activated carbon (mg/mL) | % Removal |
|--------|----------------------------------------------------|-----------------------------------------------------|-----------|
| L1     | 1.93                                               | 0.18                                                | 90.51%    |
| L2     | 2.71                                               | 0.40                                                | 85.05%    |
| L3     | 3.48                                               | 0.44                                                | 87.45%    |
| L4     | 2.18                                               | 0.34                                                | 84.20%    |
| L5     | 2.51                                               | 0.19                                                | 92.61%    |
| L6     | 2.47                                               | 0.29                                                | 88.20%    |

**Table S2.** Total reducing sugars (TRS) released after enzymatic hydrolysis of solid fraction. Numbers in parenthesis represent standard error.

| Sample           | TRS (mg/mL) |            |            |            |            | mg TRS/g pretreated biomass |          |          |          |          |
|------------------|-------------|------------|------------|------------|------------|-----------------------------|----------|----------|----------|----------|
|                  | 0 h         | 6 h        | 24 h       | 48 h       | 72 h       | 0 h                         | 6 h      | 24 h     | 48 h     | 72 h     |
| <b>S1</b>        | 0.0         | 12.5 (0.0) | 22.5 (0.9) | 33.5 (1.0) | 40.4 (0.7) | 0                           | 139 (0)  | 250 (10) | 372 (11) | 449 (8)  |
| <b>S2</b>        | 0.0         | 20.5 (0.1) | 38.7 (0.2) | 44.3 (0.3) | 53.2 (0.0) | 0                           | 228 (1)  | 430 (2)  | 492 (3)  | 591 (0)  |
| <b>S3</b>        | 0.0         | 32.9 (3.9) | 48.7 (2.7) | 57.3 (5.3) | 64.9 (1.1) | 0                           | 366 (43) | 541 (30) | 636 (59) | 721 (13) |
| <b>S4</b>        | 0.0         | 14.2 (0.6) | 23.5 (0.7) | 27.6 (1.0) | 35.3 (0.6) | 0                           | 158 (6)  | 261 (8)  | 307 (11) | 392 (6)  |
| <b>S5</b>        | 0.0         | 15.2 (0.0) | 27.3 (0.6) | 32.4 (0.8) | 35.9 (0.0) | 0                           | 169 (0)  | 303 (6)  | 360 (9)  | 399 (0)  |
| <b>S6</b>        | 0.0         | 18.2 (0.1) | 32.5 (0.1) | 38.2 (0.8) | 43.3 (0.6) | 0                           | 203 (2)  | 361 (2)  | 424 (8)  | 481 (6)  |
| <b>Untreated</b> | 0.0         | 4.7 (0.3)  | 7.6 (2.1)  | 7.3 (1.7)  | 8.3 (1.2)  | 0                           | 53 (4)   | 85 (23)  | 81 (19)  | 92 (13)  |

**Table S3.** Initial sugar concentration and consumption after 120 h of fermentation of *C. cohnii* in medium containing enzymatic hydrolysates from solid (2-times diluted) and liquid (undiluted) fraction after pretreatment. Stander error was  $\leq 2.5\%$  in all measurements.

| Sample                 | sugars (0 h)<br>(mg/mL) | sugars (120 h)<br>(mg/mL) | Total sugars<br>consumed | % sugar<br>consumption |
|------------------------|-------------------------|---------------------------|--------------------------|------------------------|
| <b>S1</b>              | 36.86                   | 3.32                      | 33.54                    | 91.0%                  |
| <b>S2</b>              | 37.90                   | 22.50                     | 15.41                    | 40.6%                  |
| <b>S3</b>              | 42.31                   | 32.97                     | 9.34                     | 22.1%                  |
| <b>S4</b>              | 21.73                   | 11.94                     | 9.78                     | 45.0%                  |
| <b>S5</b>              | 37.78                   | 13.47                     | 24.31                    | 64.3%                  |
| <b>S6</b>              | 43.32                   | 26.61                     | 16.71                    | 38.6%                  |
| <b>untreated</b>       | 3.43                    | 0.03                      | 3.40                     | 99.0%                  |
| <b>glucose 4.5 wt%</b> | 45.00                   | 24.87                     | 20.13                    | 44.7%                  |
| <b>L1</b>              | 5.07                    | 0.03                      | 5.04                     | 99.5%                  |
| <b>L2</b>              | 10.34                   | 4.15                      | 6.19                     | 59.9%                  |
| <b>L3</b>              | 7.72                    | 1.13                      | 6.59                     | 85.3%                  |
